# Supplementary material for: Effect of Immobilization of Phenolic Antioxidant on Thermo-Oxidative Stability and Aging of Poly(1-trimethylsilyl-1-propyne) in View of Membrane Application
Source: MDPI journal article supplement (doi:10.3390/polym14030462), 2022-01-24
Supplement: s1 [file s1]

# Effect of Immobilization of Phenolic Antioxidant on Thermo-Oxidative Stability and Aging of Poly(1-trimethylsilyl-1-Propyne) in View of Membrane Application

Sergey Shishatskiy <sup>1,\*</sup>, Vladimir Makrushin <sup>2</sup>, Ivan Levin <sup>2</sup>, Petra Merten <sup>1</sup>, Samira Matson <sup>2,\*</sup> and Valeriy Khotimskiy <sup>2,\*</sup>

<sup>1</sup> Helmholtz-Zentrum Hereon, Institute of Membrane Research, Max-Planck-Str. 1, 21502 Geesthacht, Germany; petra.merten@hereon.de

<sup>2</sup> A.V. Topchiev Institute of Petrochemical Synthesis of Russian Academy of Sciences, Leninsky Prospekt 29, 119991 Moscow, Russia; makrushin@ips.ac.ru (V.M.); levin@ips.ac.ru (I.L.)

\* Correspondence: sergey.shishatskiy@hereon.de (S.S.); matson@ips.ac.ru (S.M.); hotimsky@ips.ac.ru (V.K.); Tel.: +49-4152-87-2467 (S.S.); +7-495-647-5927 (ext. 214) (S.M.)

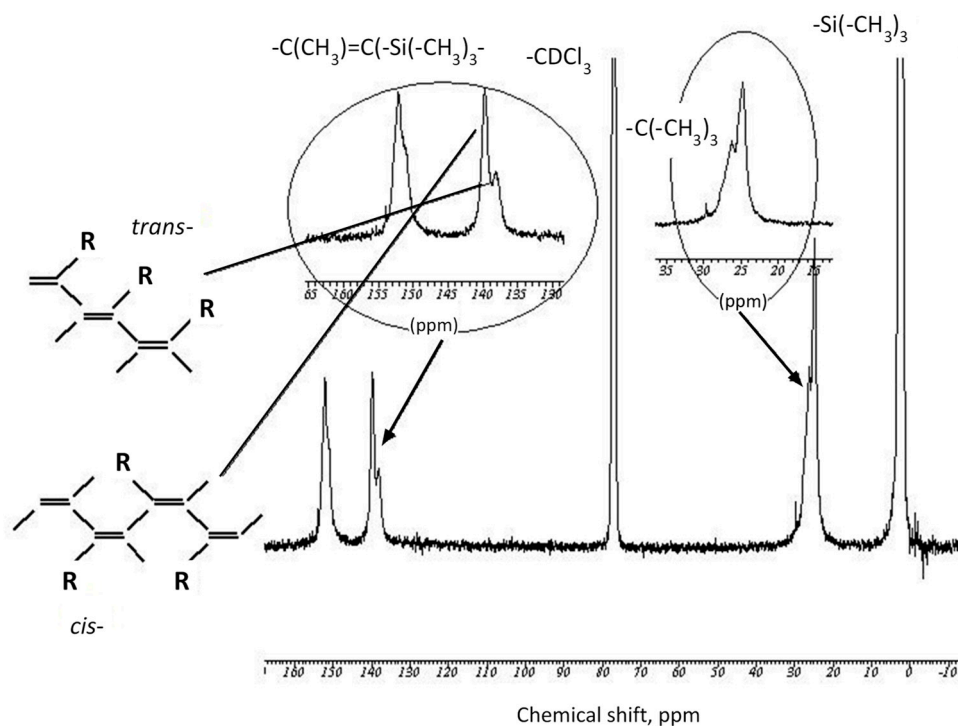

**Figure S1.** <sup>13</sup>C-NMR spectra of PTMSP used for the quantitative determination of *cis*- and *trans*-units ratio in polymer samples.
